# Supplementary material for: GenPipes: an open-source framework for distributed and scalable genomic analyses
Source: PubMed Central journal article supplement (PMC6559338; doi:10.1093/gigascience/giz037), 2019-06-11

Figure S1

dnaseq.py -t mpileup

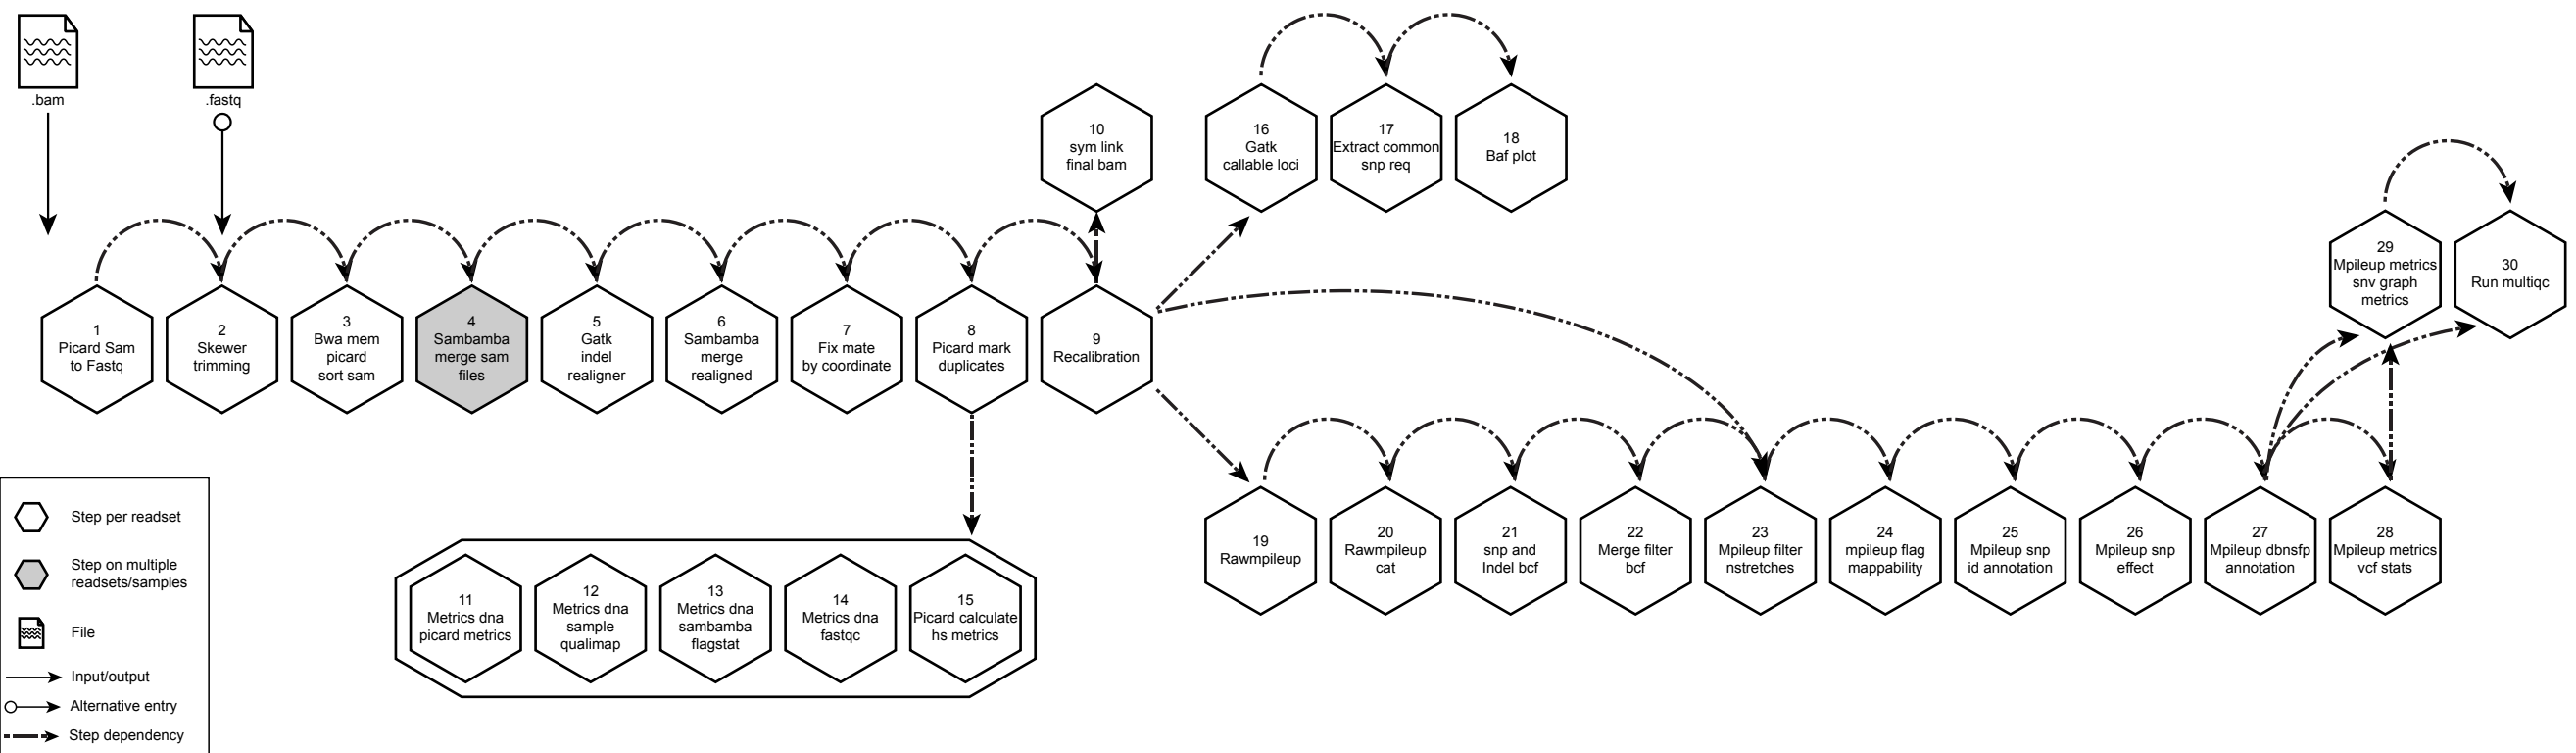

**Figure S2****dnaseq\_high\_coverage.py**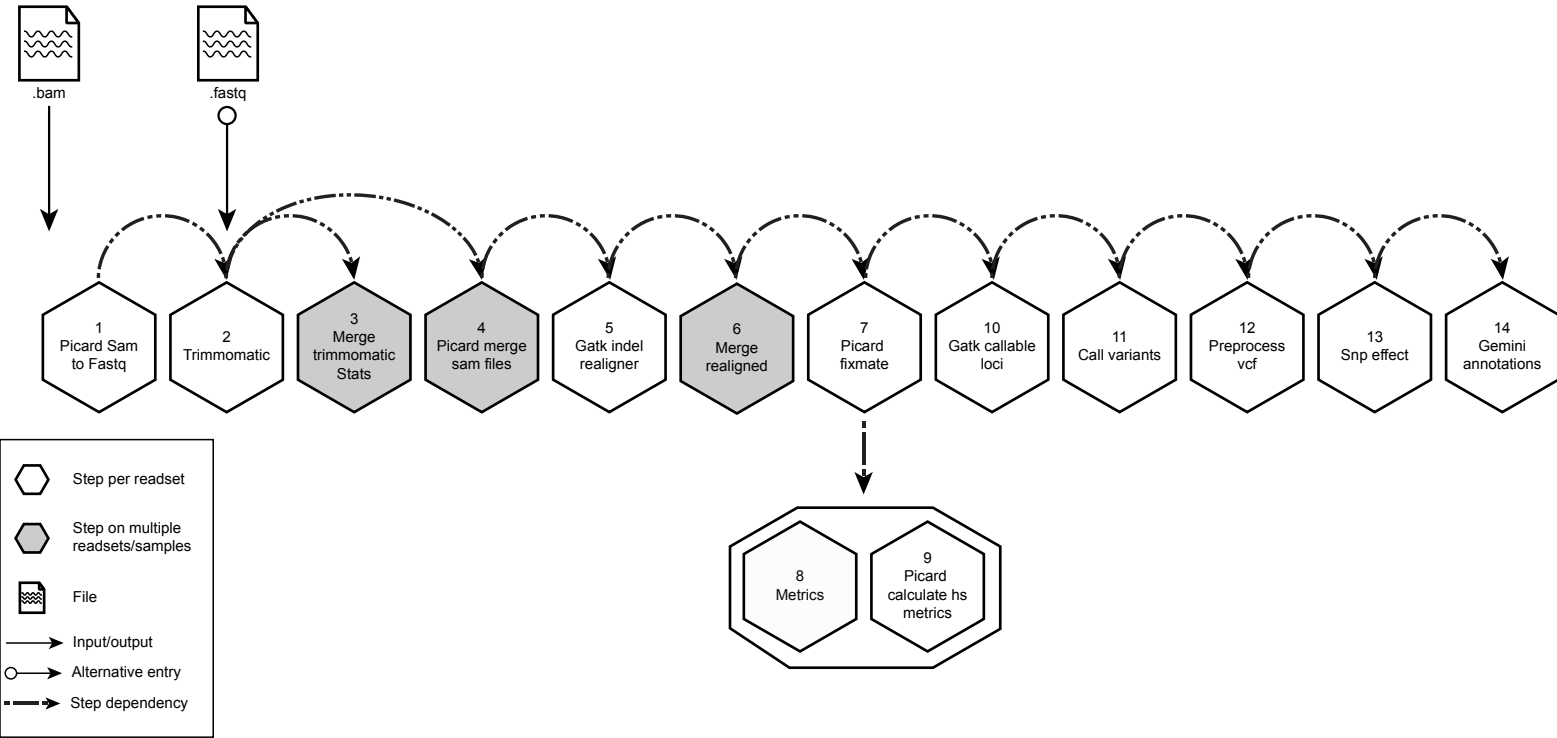

**Figure S3****rnaseq.py**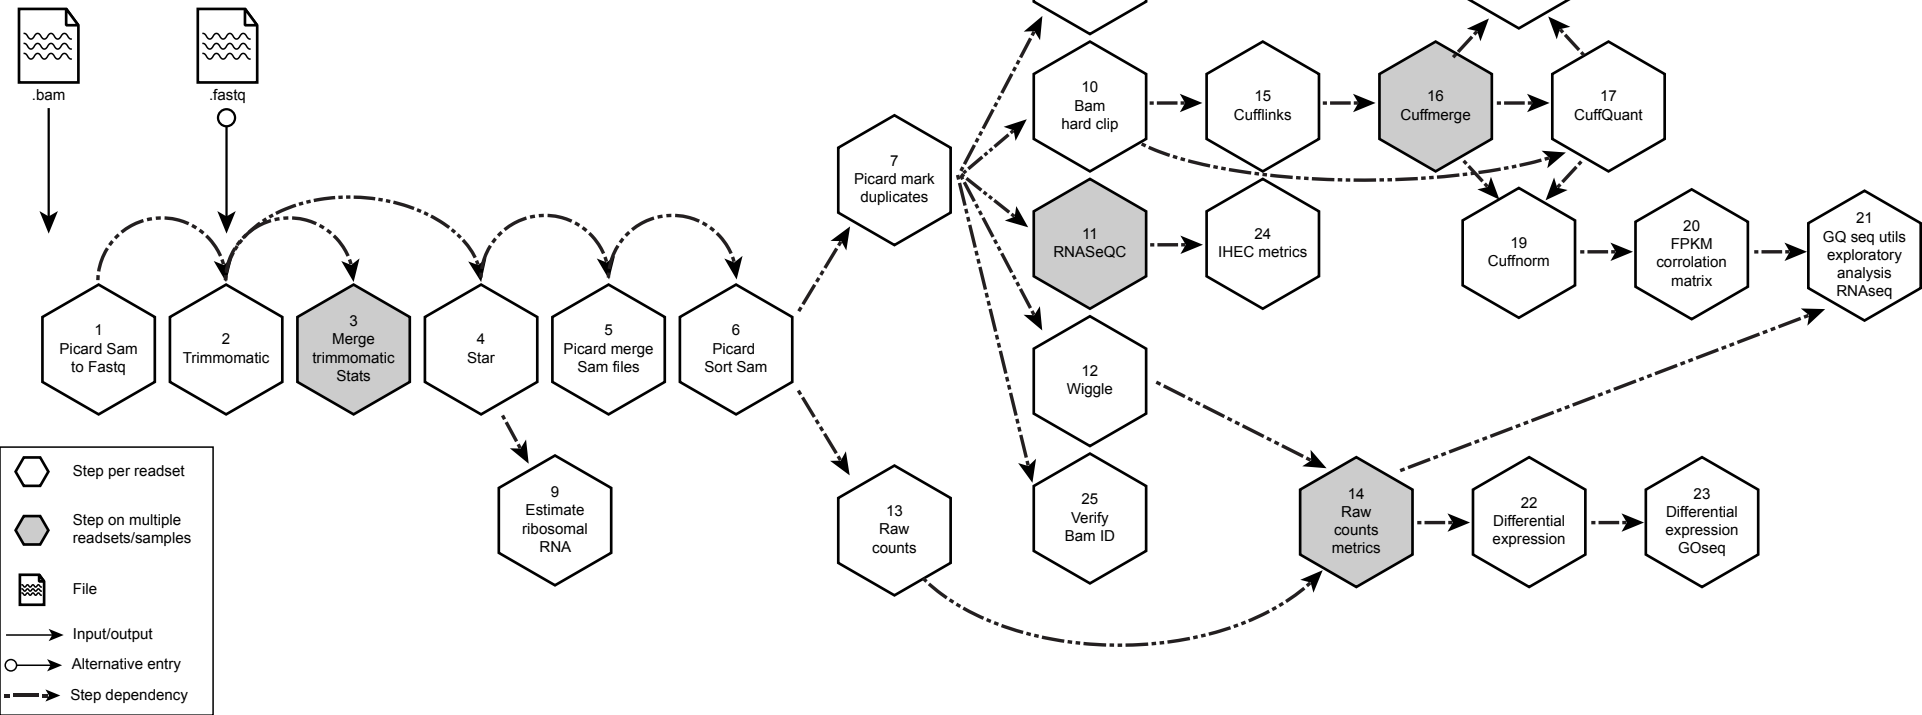

# Figure S4

## rnaseq\_light.py

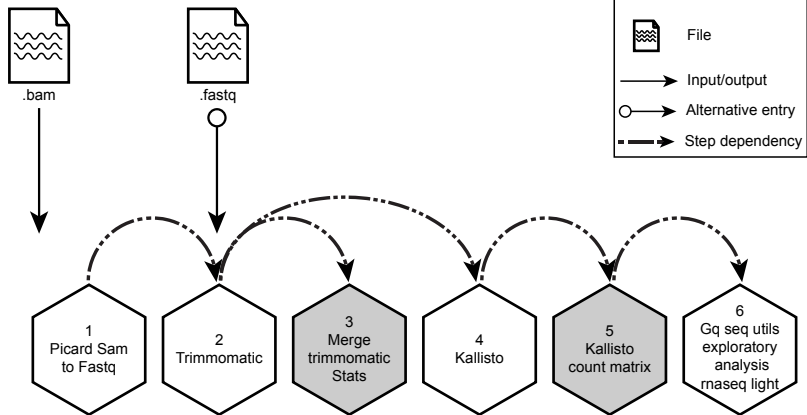

Figure S5

rnaseq\_denovo\_assembly.py

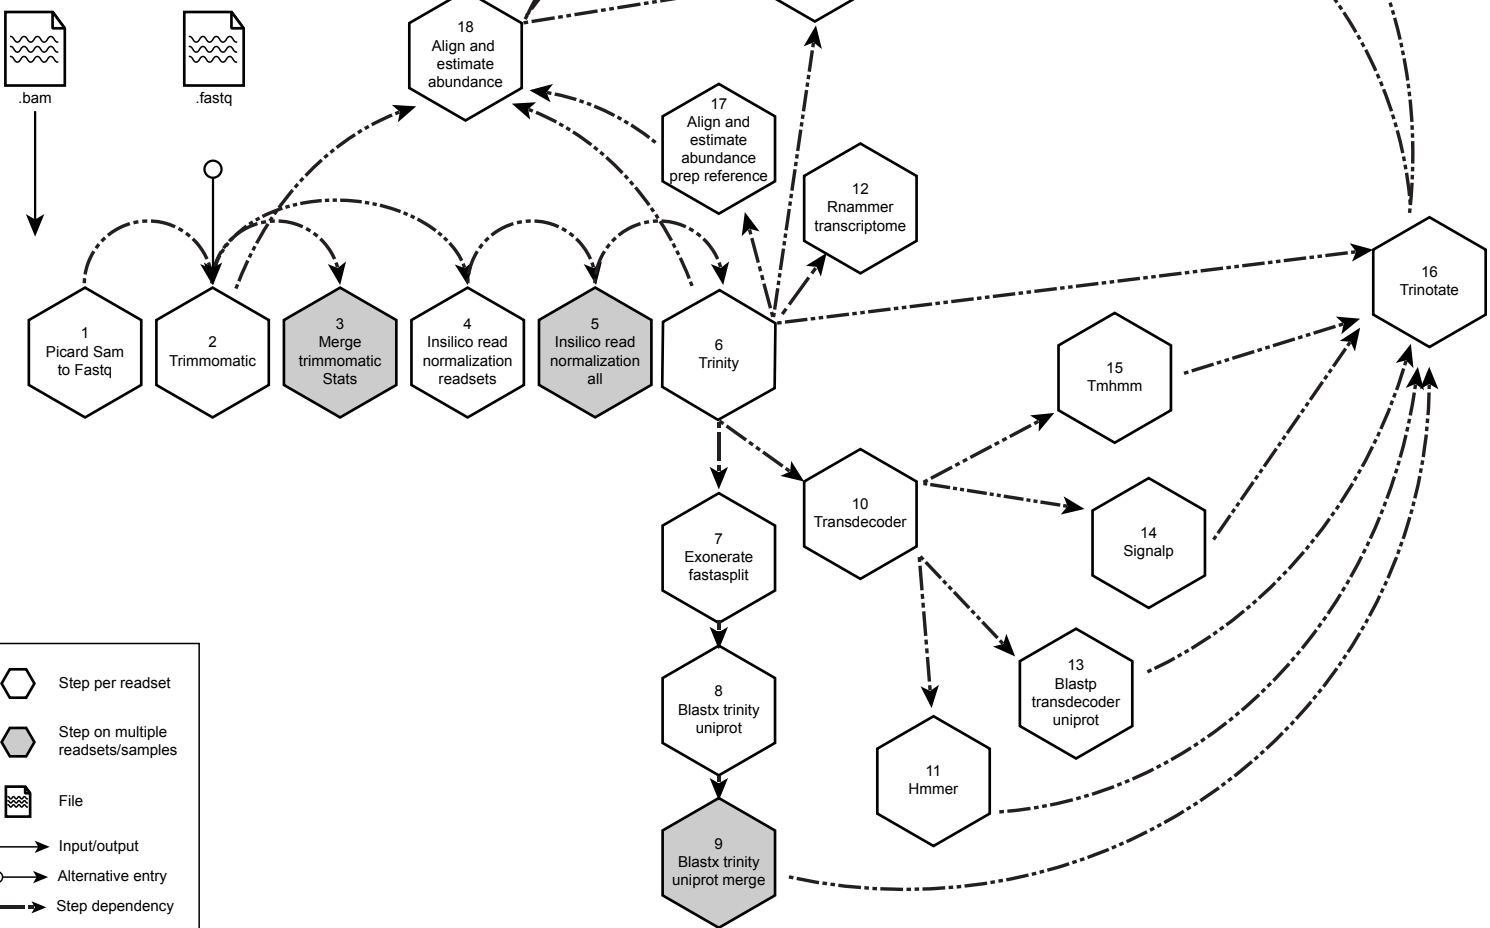

**Figure S6****chipseq.py**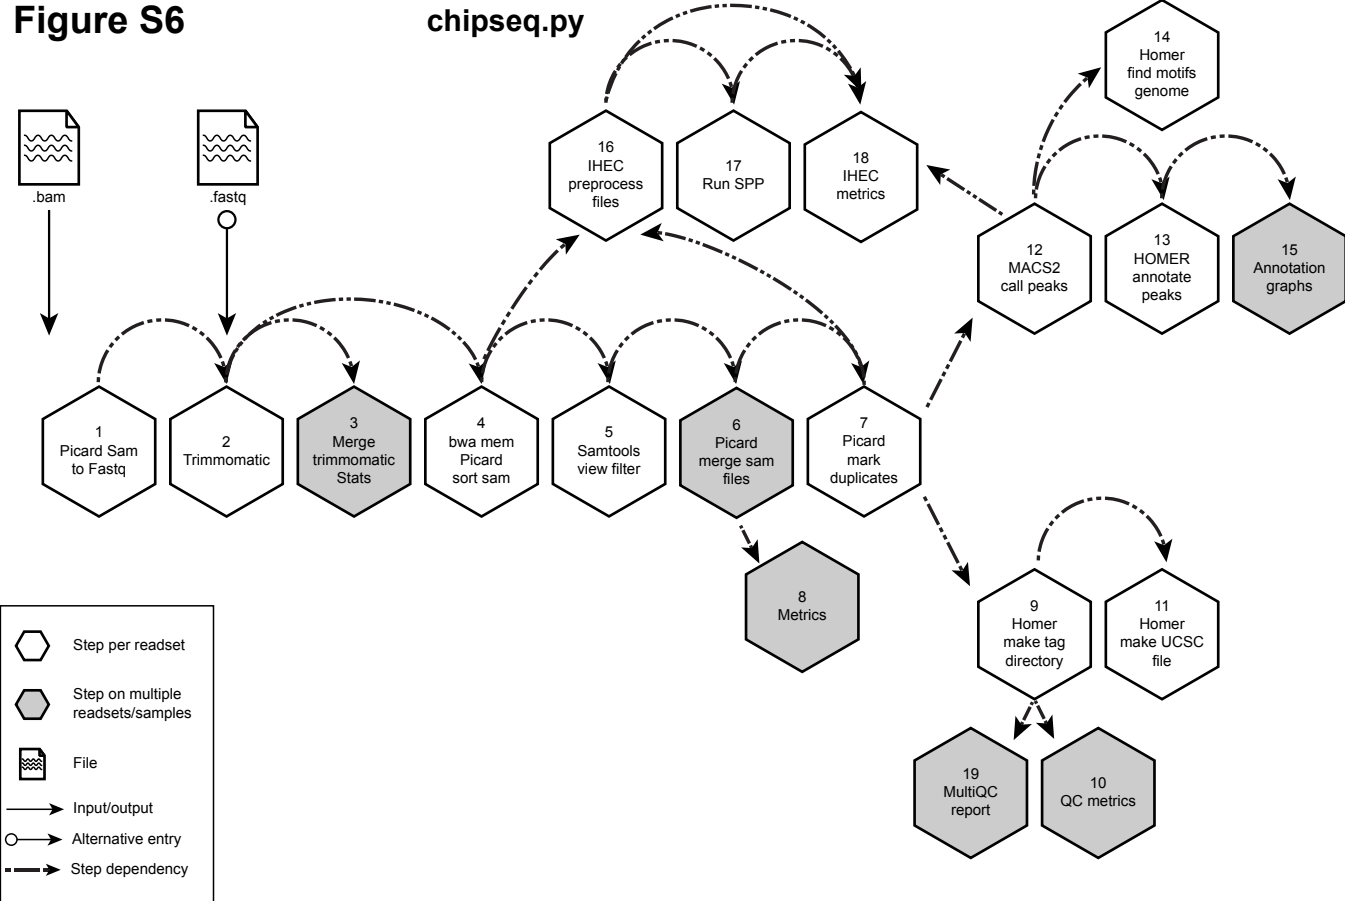

**Figure S7****tumor\_pair.py -t sv**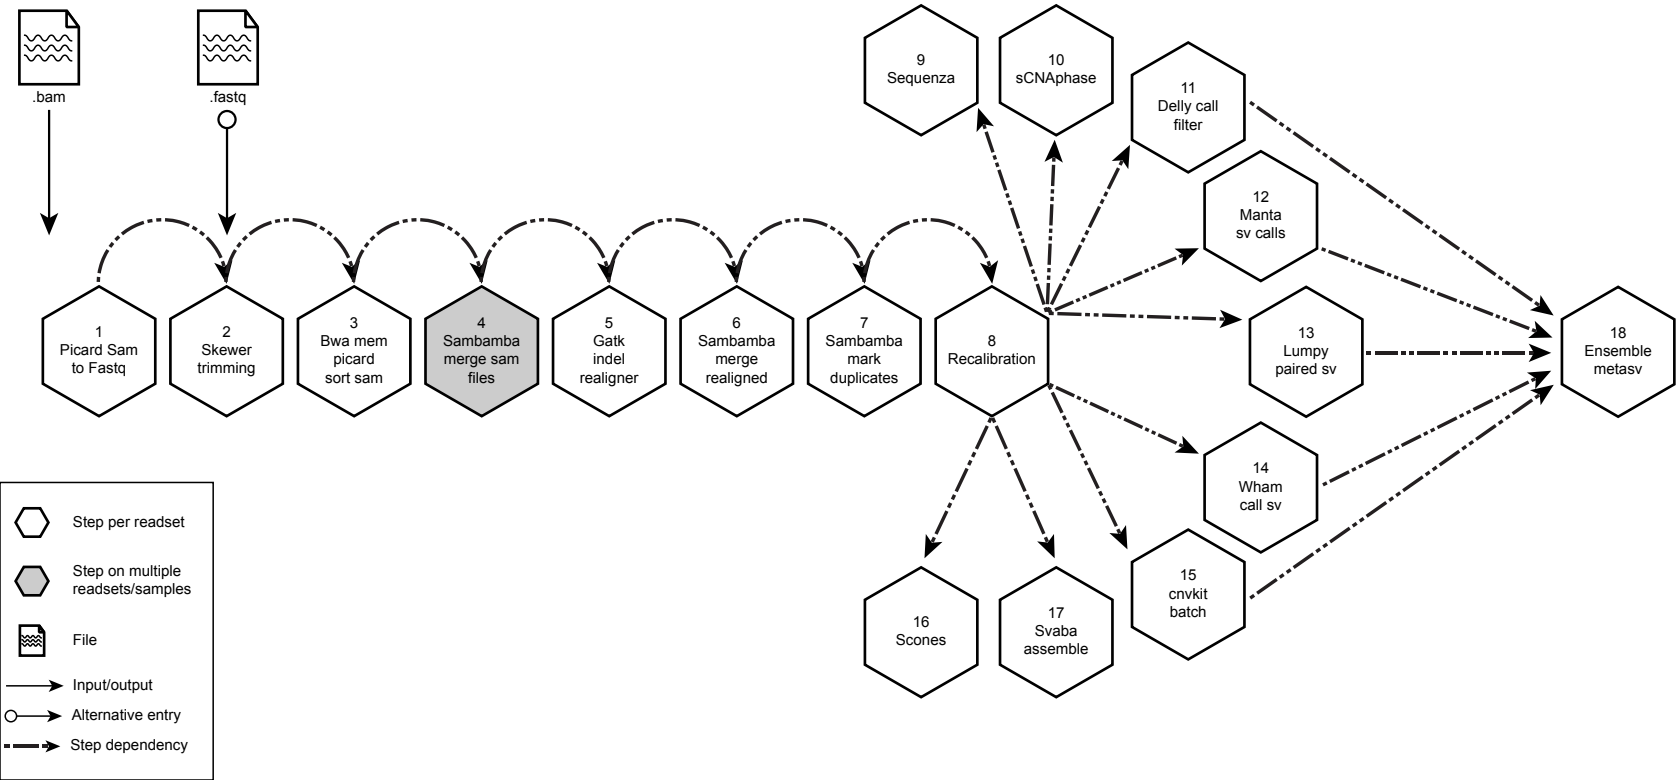

Figure S8

tumor\_pair.py -t ensemble

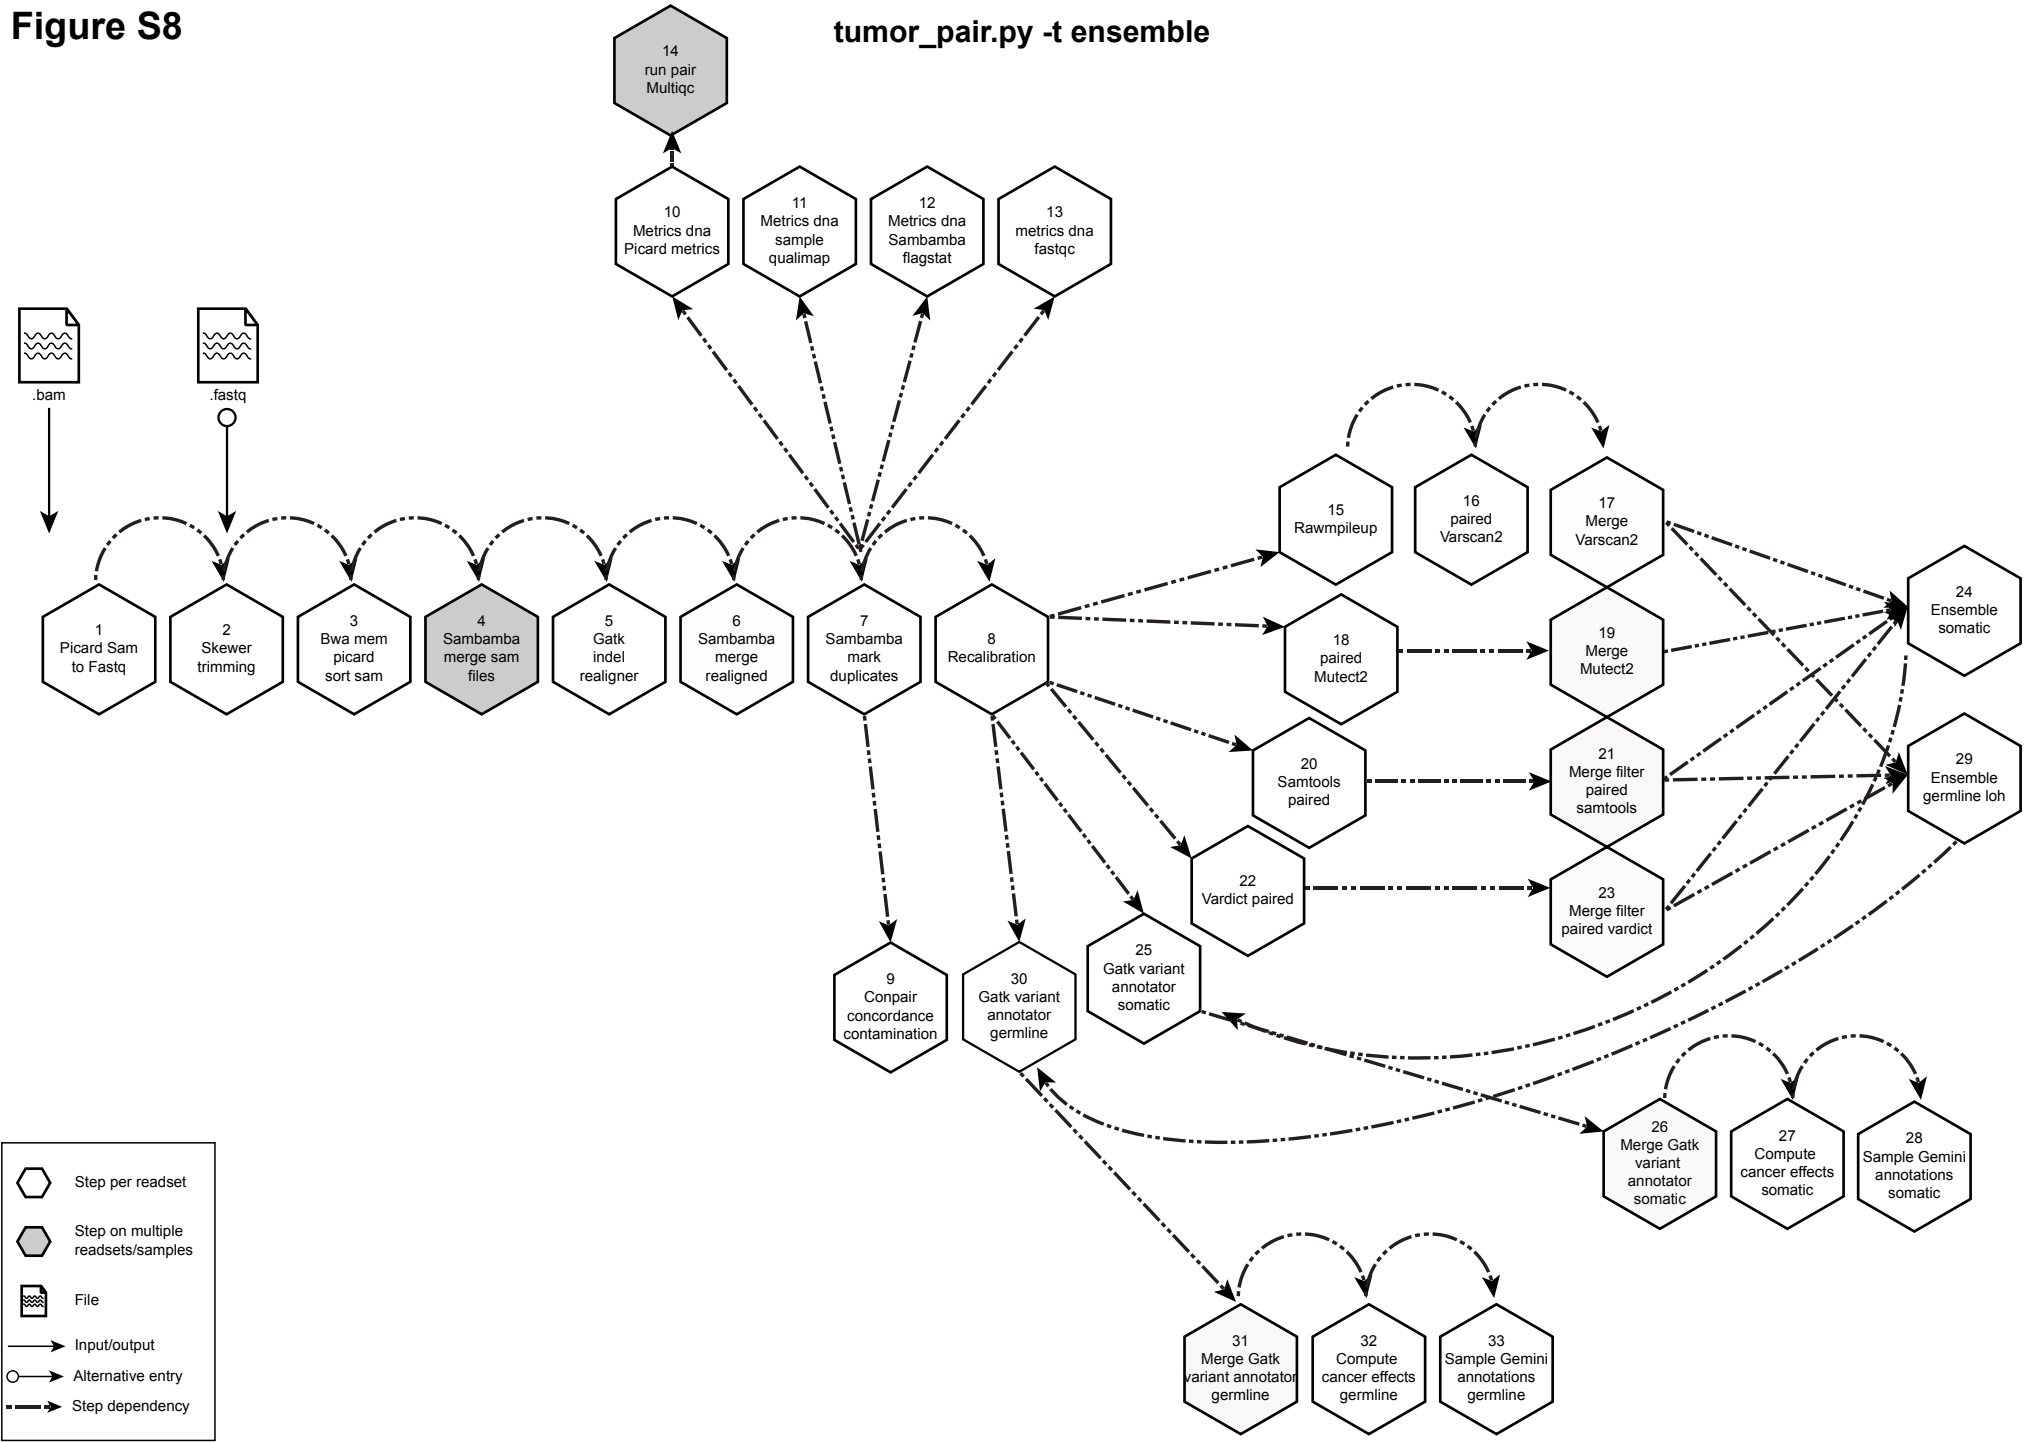



**Figure S9****tumor\_pair.py -t fastpass**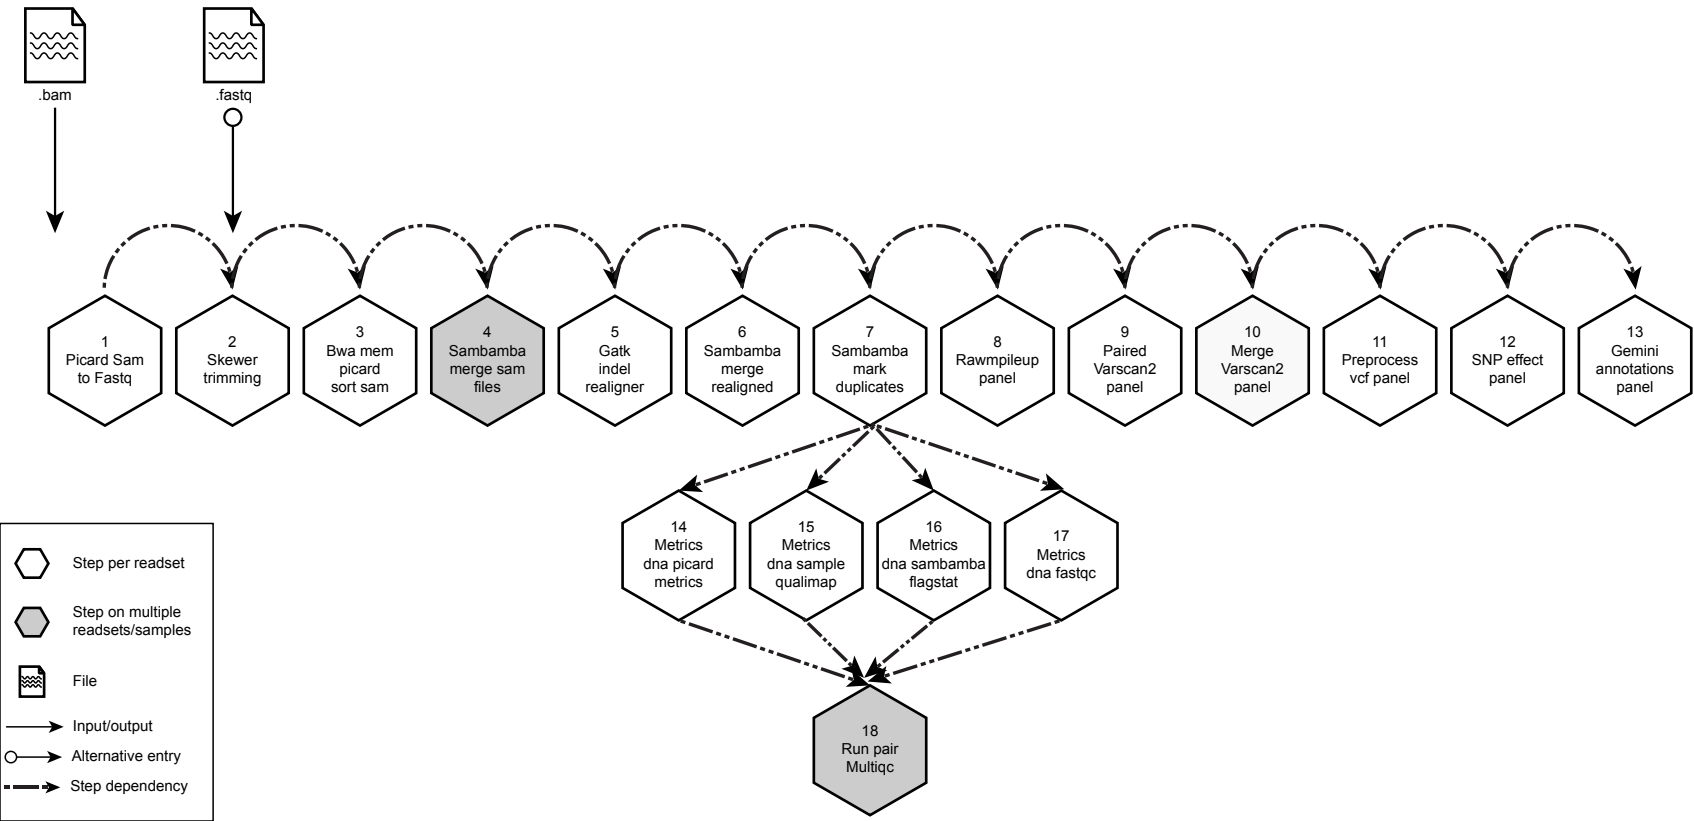

**Figure S10****methyelseq.py**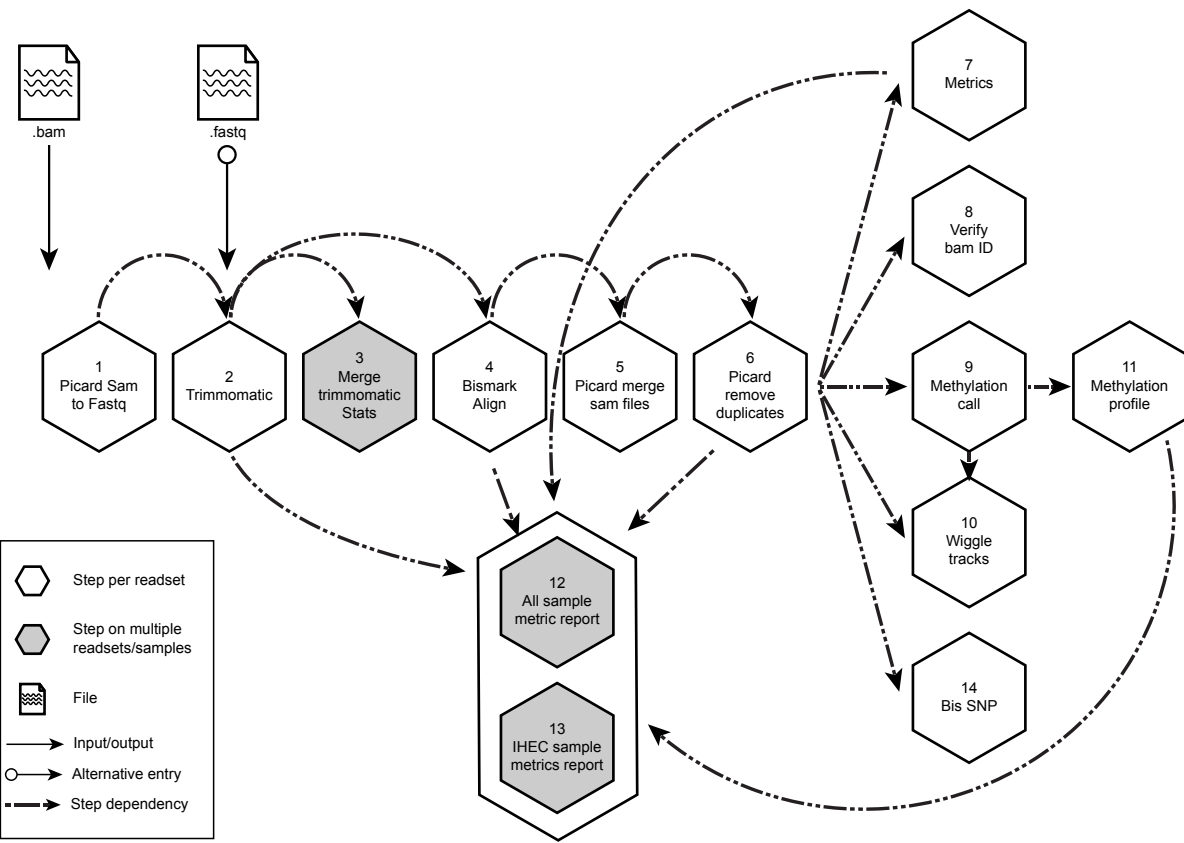

**Figure S11****hicseq.py -t hic**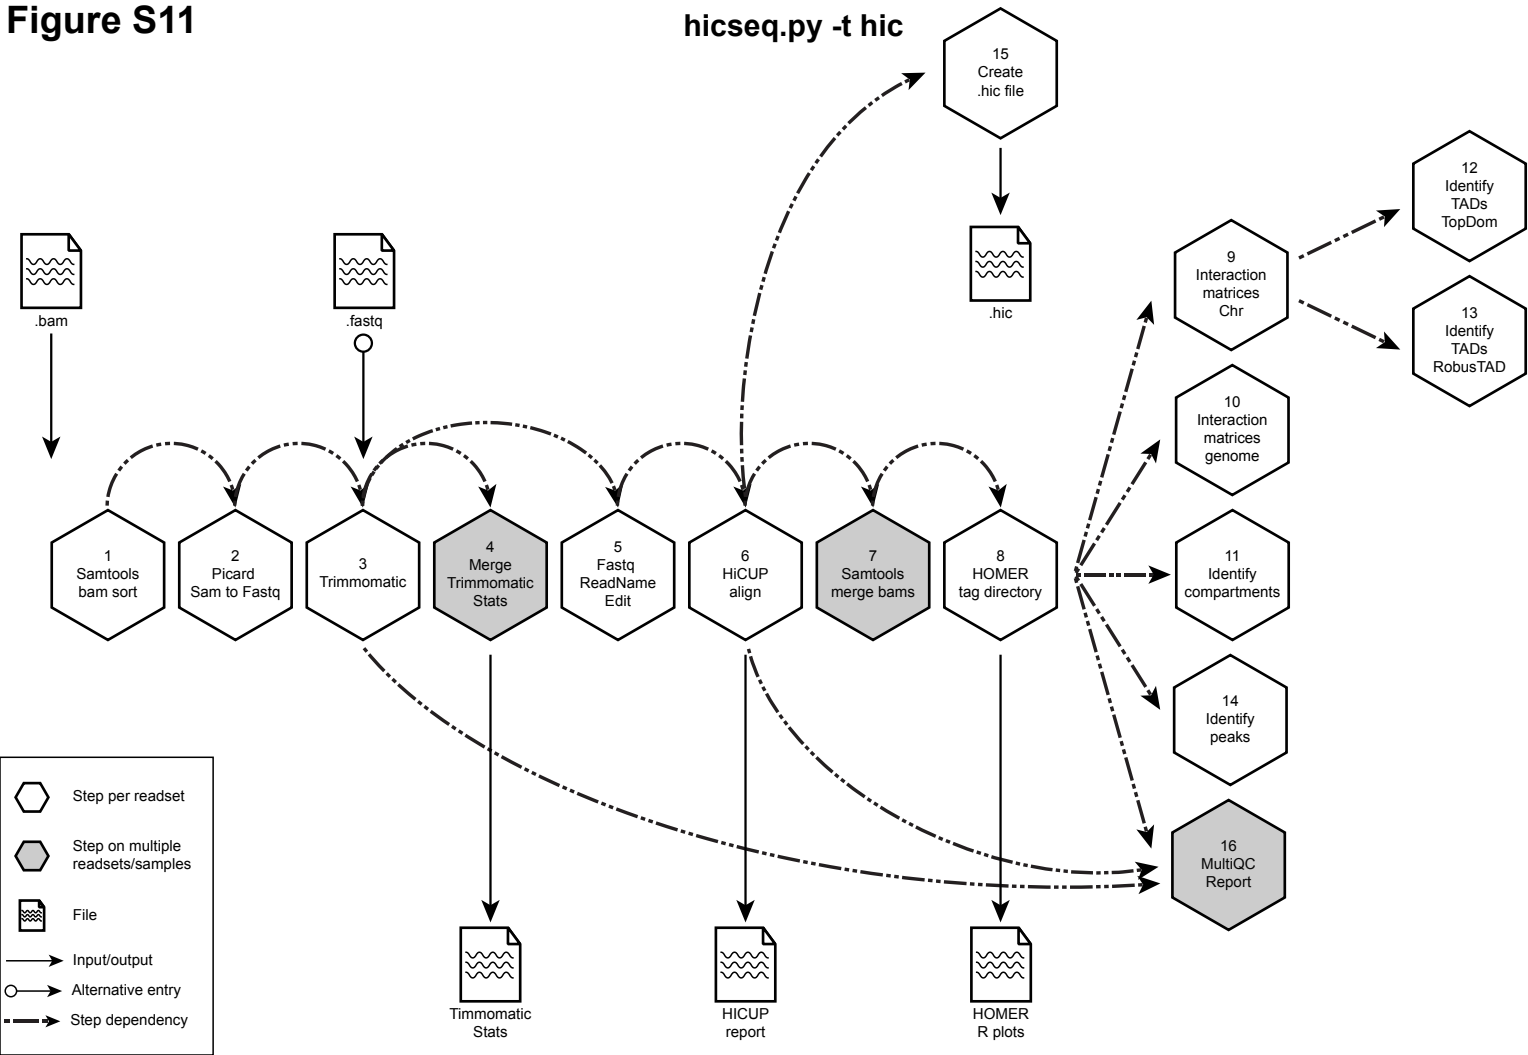

**Figure S12****hicseq.py -t capture**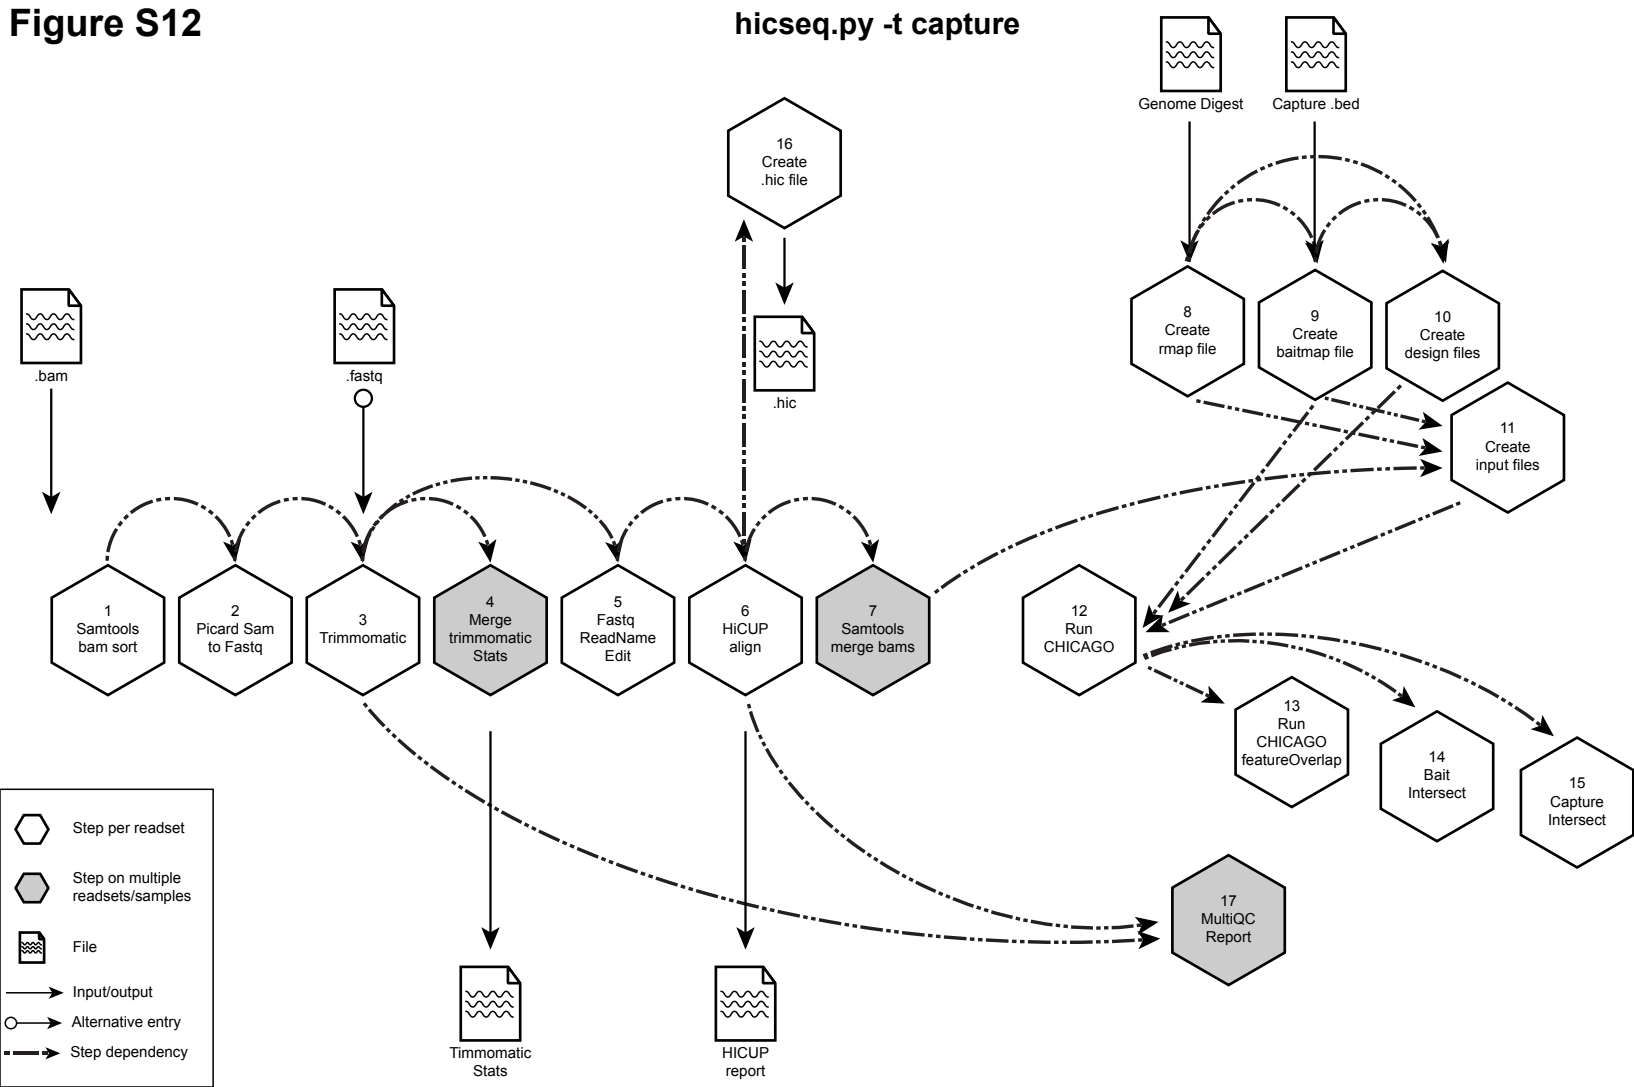

Figure S13

ampliconseq.py

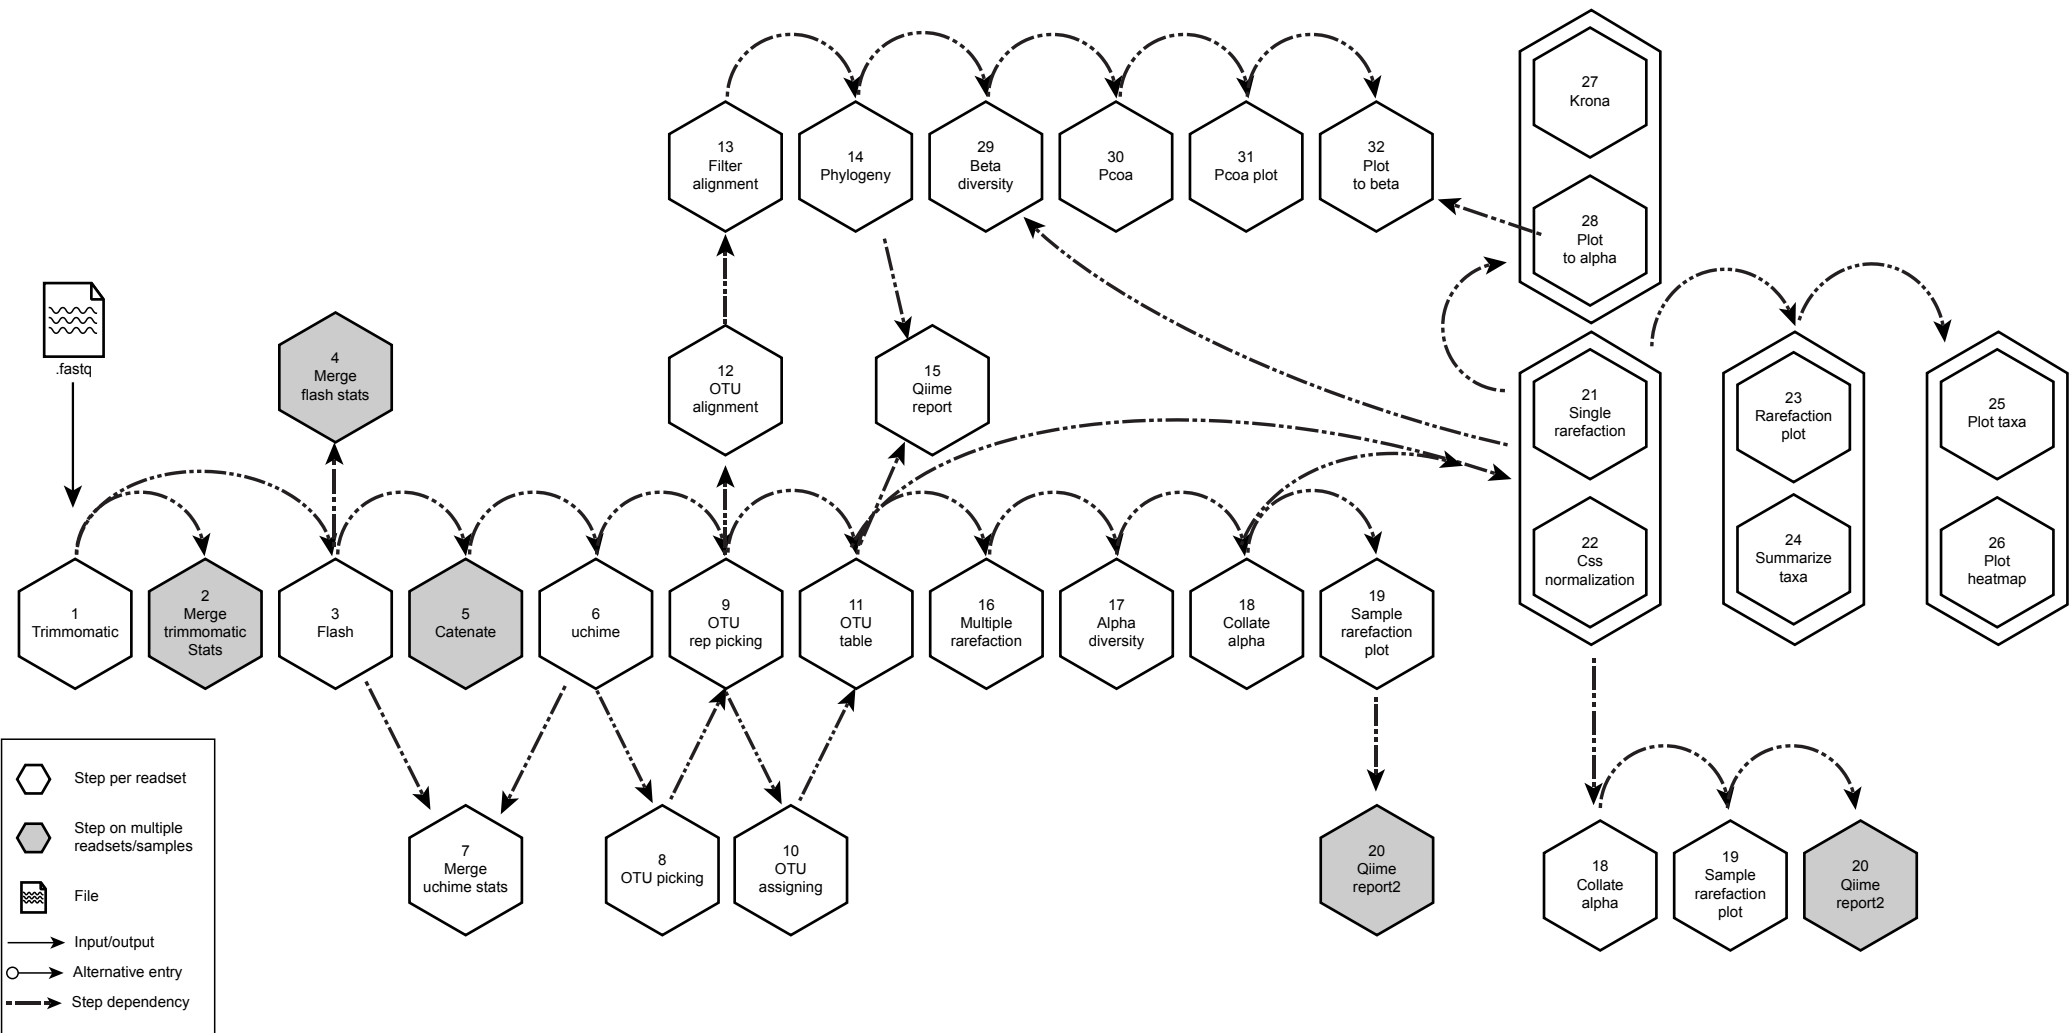

**Figure S14****pacbio\_assembly.py**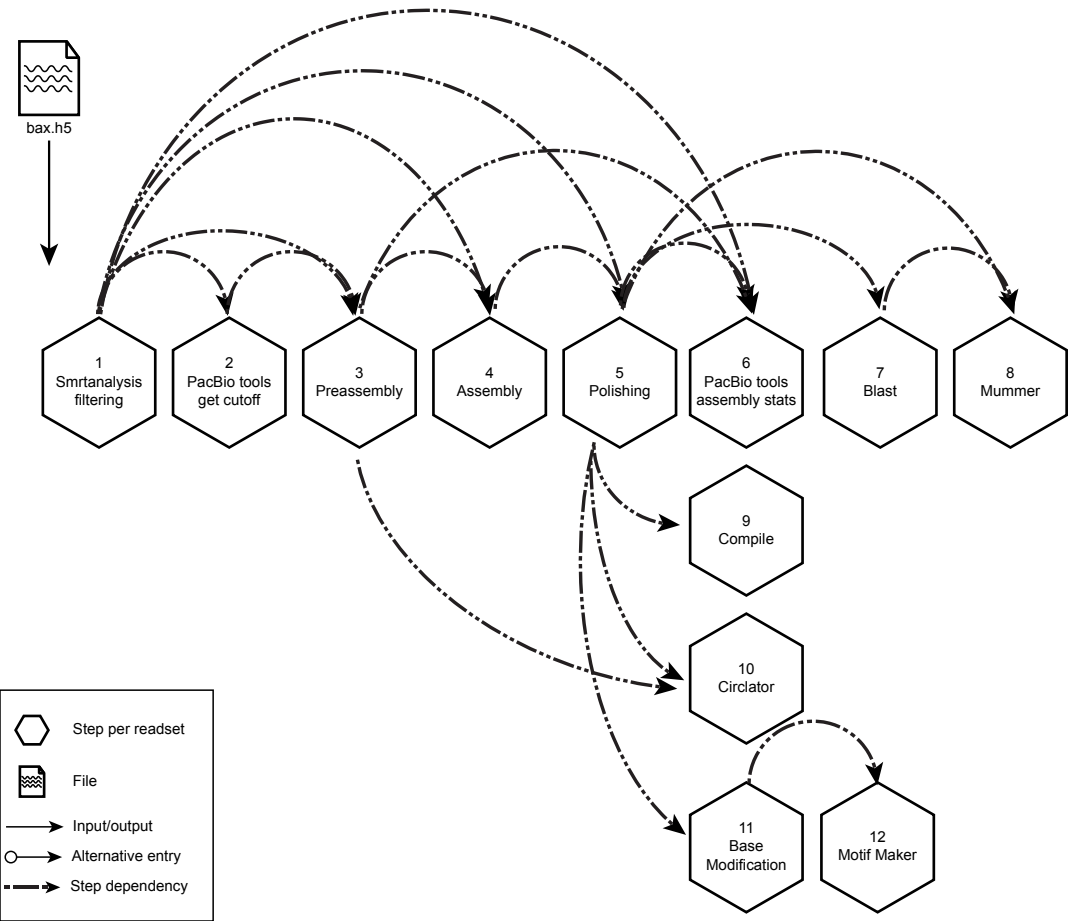

Supplement: giz037_supplemental_file.pdf [file giz037_supplemental_file.pdf]
